# Supplementary material for: Strategies of constructing stable and high sulfur loading cathodes based on the blade-casting technique
Source: Royal Society of Chemistry journal article supplement (doi:10.1039/c7ta01675a), 2017-01-01
Supplement: c7ta01675a1.pdf [file c7ta01675a1.pdf]

## Supporting Information

### The Strategies of Constructing Stable and High Sulfur Loading Cathodes based on Blade-Casting Technique

Fanglei Zeng,<sup>a</sup> Anbang Wang,<sup>b\*</sup> Weikun Wang,<sup>b\*</sup> Zhaoqing Jin<sup>b</sup> and Yu-Sheng Yang<sup>b</sup>

<sup>a</sup> School of Materials Science & Engineering, Beijing Institute of Technology, Beijing 100081, China.

<sup>b</sup> Military Power Sources Research and Development Center, Research Institute of Chemical Defense, Beijing 100191, China.

E-mail: wab\_wang2000@126.com; wangweikun2002@126.com

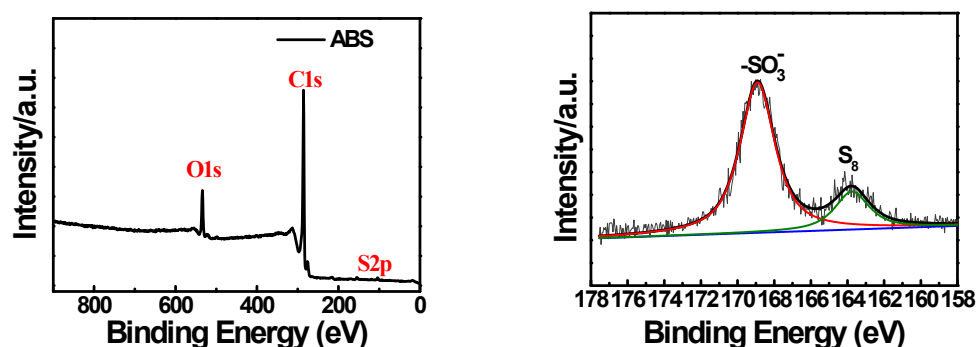

**Figure S1.** XPS spectra of ABS: (a) wide spectra, (b) S 2p.

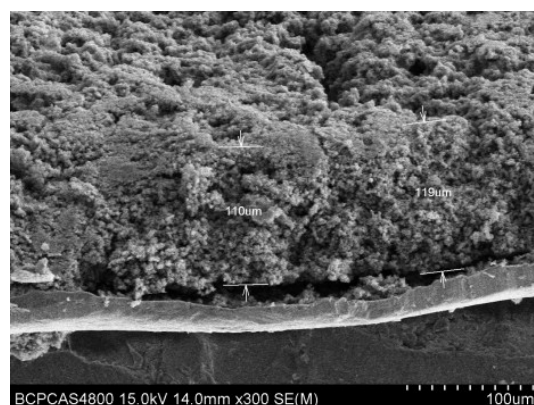

**Figure S2.** The morphologies of the CS@CTAB/ABS composite electrode (S content: 76 wt% in electrode, S mass loading: 6.7 mg cm<sup>-2</sup>).

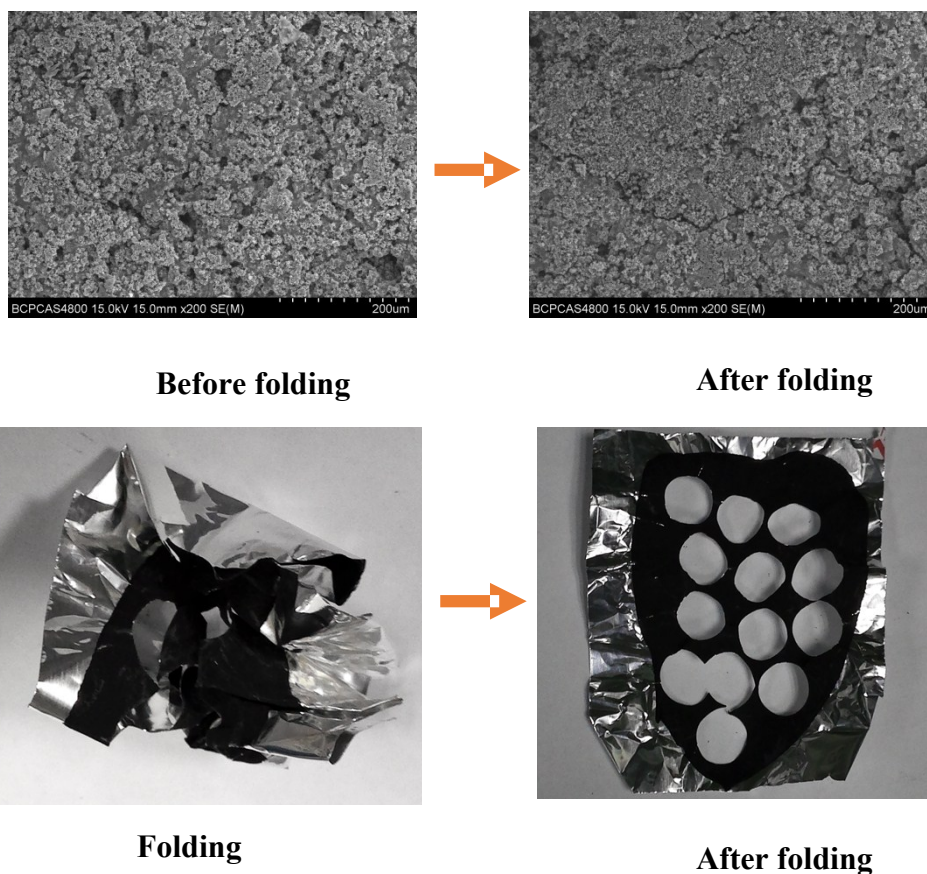

**Figure S3.** Photographs of the CS@CTAB/ABS composite electrode (S content: 76 wt% in electrode, S mass loading:  $6.7 \text{ mg cm}^{-2}$ ) during and after folding.

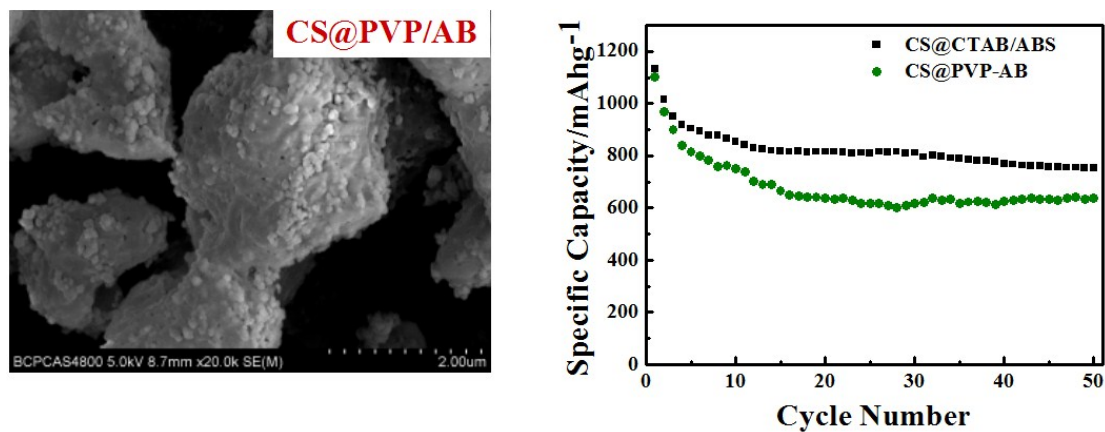

**Figure S4.** (a) The morphologies of CS@PVP/ABS composite. (b) Cycle performance of CS@CTAB/ABS and CS@PVP/AB composite electrodes with sulfur mass loading of  $6.7 \text{ mg cm}^{-2}$  at  $100 \text{ mA g}^{-1}$  (electrolyte/sulfur ratio of 5).

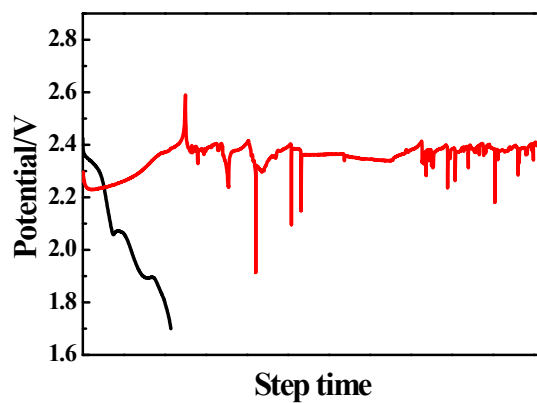

**Figure S5.** The voltage profiles of the **CS@CTAB/ABS+CNTS** electrode with sulfur mass loading of  $11.1 \text{ mg cm}^{-2}$  at 12th cycle. The significant voltage fluctuation indicates the formation of lithium dendrite.
